# Supplementary material
Source: Royal Society of Chemistry journal article supplement (doi:10.1039/d6ew00095a)
Supplement: d6ew00095a1.pdf [file d6ew00095a1.pdf]

## Supplementary Materials

### 1. Methodology

#### 1.1 Simulation of synthetic human faeces and urine

The selected recipes of human faeces and urine were originally developed by <sup>1</sup> and <sup>2</sup>, respectively, and then were modified by <sup>3,4</sup>. Table S1 shows the recipe used in this study to simulate human faeces and urine. Yeast extract, cellulose, Psyllium husk, NaCl, KCl, and CaCl<sub>2</sub> were added first and mixed, followed by adding oleic acid and miso pastes, and these were mixed thoroughly before adding water to adjust TS content needed (Photo S1a). Miso pastes and psyllium which were purchased from WholeFoods as Clearspring Organic Japanese Miso Soup Paste and KIKI Organic Psyllium Husk. Slow stirring is needed when adding water until the mixture is gelled fully (Photo S1b) and then the synthetic faeces are ready to use. Distilled water can be added in any amount as required and 80% of the total wet weight was used in this study (Table S1). Fig.1c presents the different rheology of the synthetic faeces when adding ~30 %wwt distilled water, as an example. The synthetic human excreta are then refrigerated at 4 °C until being used. To simulate human excreta, the ratio of faeces and urine simulants is in accord with their reported daily production– 120 g wet faeces simulants to 300 mL urine simulants <sup>3</sup>.

**Table S1** Recipes used in this study to simulate human excreta <sup>3,4</sup>.

| Synthetic faeces           |                                  | Synthetic urine                 |              |
|----------------------------|----------------------------------|---------------------------------|--------------|
| Component                  | Composition in dry weight (dwt%) | Component                       | Amount (g/L) |
| Yeast extract              | 30                               | Urea                            | 14.2         |
| Microcrystalline cellulose | 10                               | Creatinine                      | 3            |
| Psyllium husk              | 17.5                             | Diammonium citrate              | 2            |
| Miso pastes                | 17.5                             | NaCl                            | 8            |
| Oleic acid                 | 20                               | KCl                             | 1.65         |
| NaCl                       | 2                                | KHSO <sub>4</sub>               | 0.5          |
| KCl                        | 2                                | MgSO <sub>4</sub>               | 0.2          |
| CaCl <sub>2</sub>          | 1                                | KH <sub>2</sub> PO <sub>4</sub> | 1.75         |
| Water                      | 20 % of wet weight (wwt%)        | KHCO <sub>3</sub>               | 0.5          |

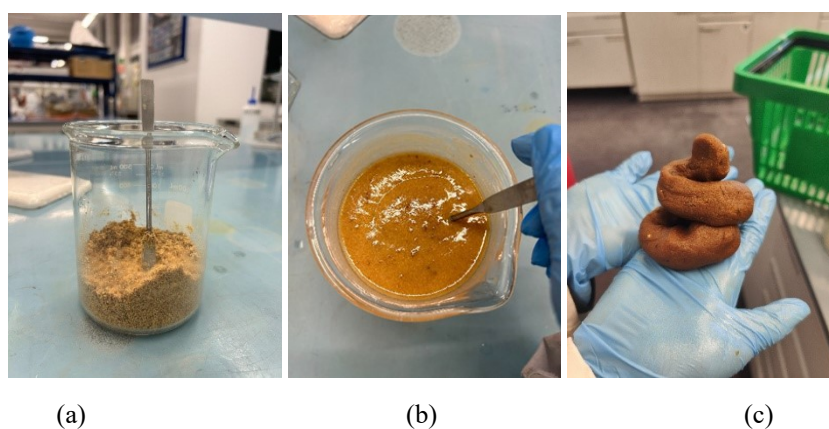

**Photo S1.** Simulation process of synthetic human faeces in the ratio of 20% dry weight and 80% distilled water

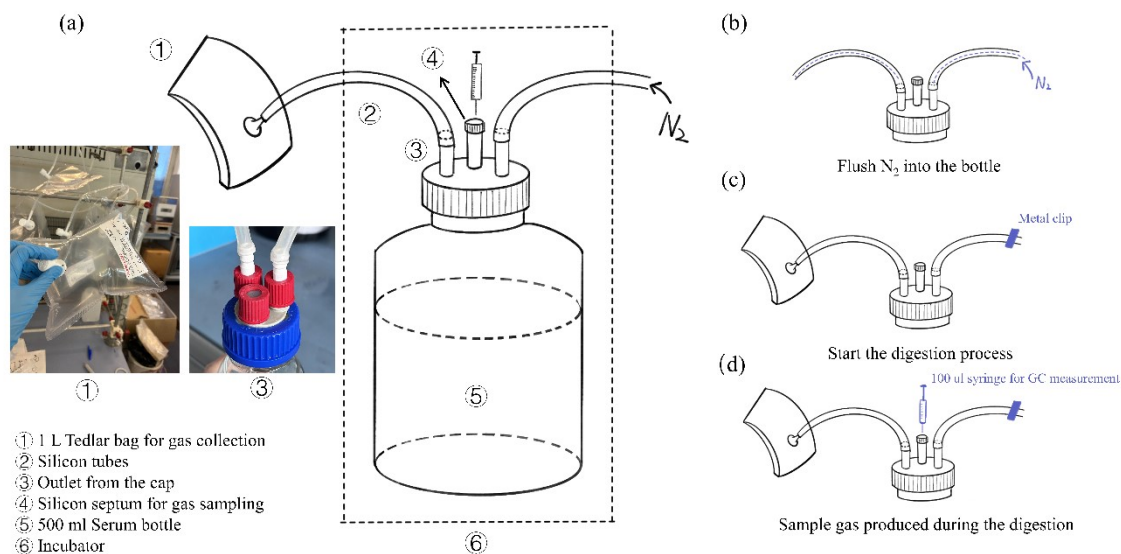

**Figure S1.** (a) Experiment set-up scheme and (b) working procedure for AD.

1.2 Supplementary characteristics of materials used in this study

**Table S2.** Characteristics of FSB from proximate and ultimate analysis.

| Proximate analysis | Volatile matter | Fixed carbon | Ash          | Moisture content |
|--------------------|-----------------|--------------|--------------|------------------|
|                    | 19.95±2.36 %    | 8.43±2.20 %  | 66.54±0.98 % | 5.08±0.72 %      |
| Ultimate analysis  | C               | H            | N            | S                |
| □                  | 17.28±0.21 %    | 1.29±0.05 %  | 2.65±0.30 %  | 0.31±0.18 %      |

**Table S3.** Total concentrations of elements detected in simulated faeces and urine, inoculum, feedstock and biochar used in this study.

| Metal | Simulated faeces (mg/L) | Simulated urine (mg/L) | Inoculum (mg/kg wwt*) | Feedstock mixture (mg/L) | Biochar (mg/kg TS) |
|-------|-------------------------|------------------------|-----------------------|--------------------------|--------------------|
| Al    | <LOD**                  | <LOD                   | 4876.1 ± 20.5         | 730.8 ± 20.8             | 203181 ± 1667.6    |
| Fe    | <LOD                    | <LOD                   | 16269.0 ± 187.0       | 2383.3 ± 370.8           | 28915.8 ± 1548.7   |
| Zn    | <LOD                    | <LOD                   | 130.5 ± 3.8           | <LOD                     | 1402.4 ± 127.4     |
| Cd    | <LOD                    | <LOD                   | <LOD                  | <LOD                     | 6.6 ± 1.3          |
| Pb    | <LOD                    | <LOD                   | <LOD                  | <LOD                     | 89.0 ± 22.0        |
| Cu    | <LOD                    | <LOD                   | 166.6 ± 0.3           | <LOD                     | 147.7 ± 9.4        |
| Mg    | 85.2 ± 5.4              | 9.3 ± 1.6              | 781.1 ± 4.4           | 95.4 ± 3.8               | 28482.9 ± 2581.6   |
| Li    | <LOD                    | <LOD                   | <LOD                  | <LOD                     | 203.4 ± 40.3       |
| Ca    | 757.8 ± 22.8            | <LOD                   | 12798.0 ± 44.1        | 1709.2 ± 61.8            | 71015.8 ± 8327.8   |
| Mn    | <LOD                    | <LOD                   | <LOD                  | <LOD                     | 1528.9 ± 117.0     |
| Na    | 4241.0 ± 52.7           | 3498.0 ± 41.3          | 446.5 ± 33.0          | 731.8 ± 21.9             | 3101.5 ± 506.2     |

|    |      |      |            |      |              |
|----|------|------|------------|------|--------------|
| Co | <LOD | <LOD | <LOD       | <LOD | 5.6 ± 0.8    |
| Cr | <LOD | <LOD | <LOD       | <LOD | 47.5 ± 2.8   |
| Ni | <LOD | <LOD | <LOD       | <LOD | 28.3 ± 2.4   |
| Ba | <LOD | <LOD | 75.8 ± 0.1 | <LOD | 365.3 ± 25.6 |

Data are expressed as mean values ( $n=3$ ) ± standard deviation.

\**wwt*: wet weight

\*\**LOD*: Limit of Detection.

**Table S4.** Initial TS content after FSB addition.

| Initial TS content | Average | STD    |
|--------------------|---------|--------|
| B0                 | 4.38%   | 0.043% |
| B3                 | 4.58%   | 0.042% |
| B6                 | 4.78%   | 0.040% |
| B9                 | 4.99%   | 0.039% |
| B12                | 5.19%   | 0.037% |

### 1.3 TN digestion method

Briefly, homogenised samples ( $0.400 \pm 0.001$  g) were weighed into 75 mL digestion tubes, including reagent blanks and quality control standards in each batch. A salicylic acid–sulfuric acid digestion mixture containing a selenium catalyst was added to each tube to retain nitrate/nitrite and catalyse the digestion. Samples were allowed to react for at least 2 h (or overnight), followed by heating at 100 °C for 2 h. After cooling, 30% (w/w) hydrogen peroxide was added dropwise to complete oxidation of organic matter. The samples were then further heated at 330 °C until digestion was complete and the digest became clear to pale yellow. After cooling, digests were diluted to 75.0 mL with distilled water and analysed for TN as ammonium using the Skalar San++ analyser.

## 2. Batch cumulative methane and gas yield

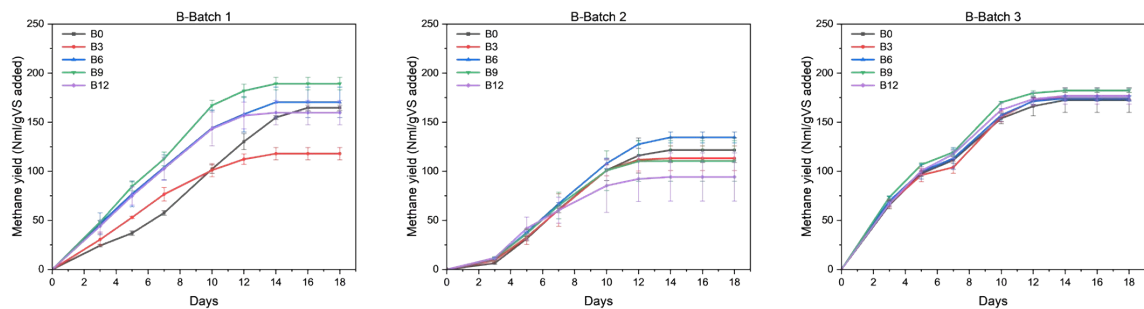

(a)

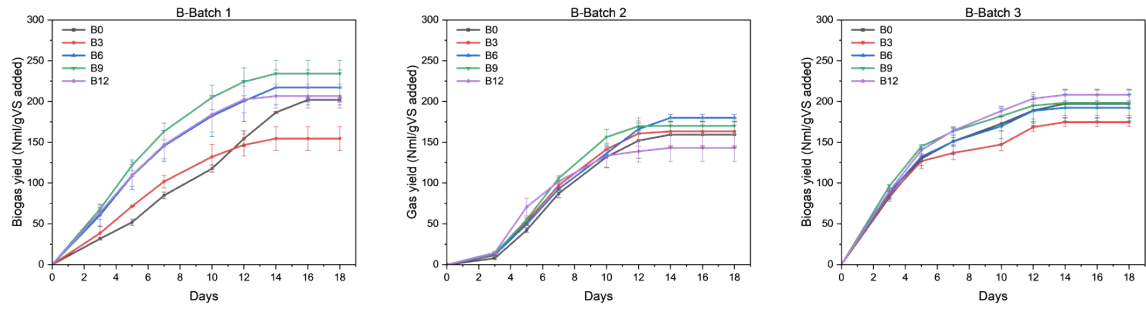

(b)

**Figure S2.** Cumulative (a) CH<sub>4</sub> and (b) gas yield from 3 batches of AD of synthetic human excreta with different biochar addition doses (n=3).

### 3. Kinetic models fitting

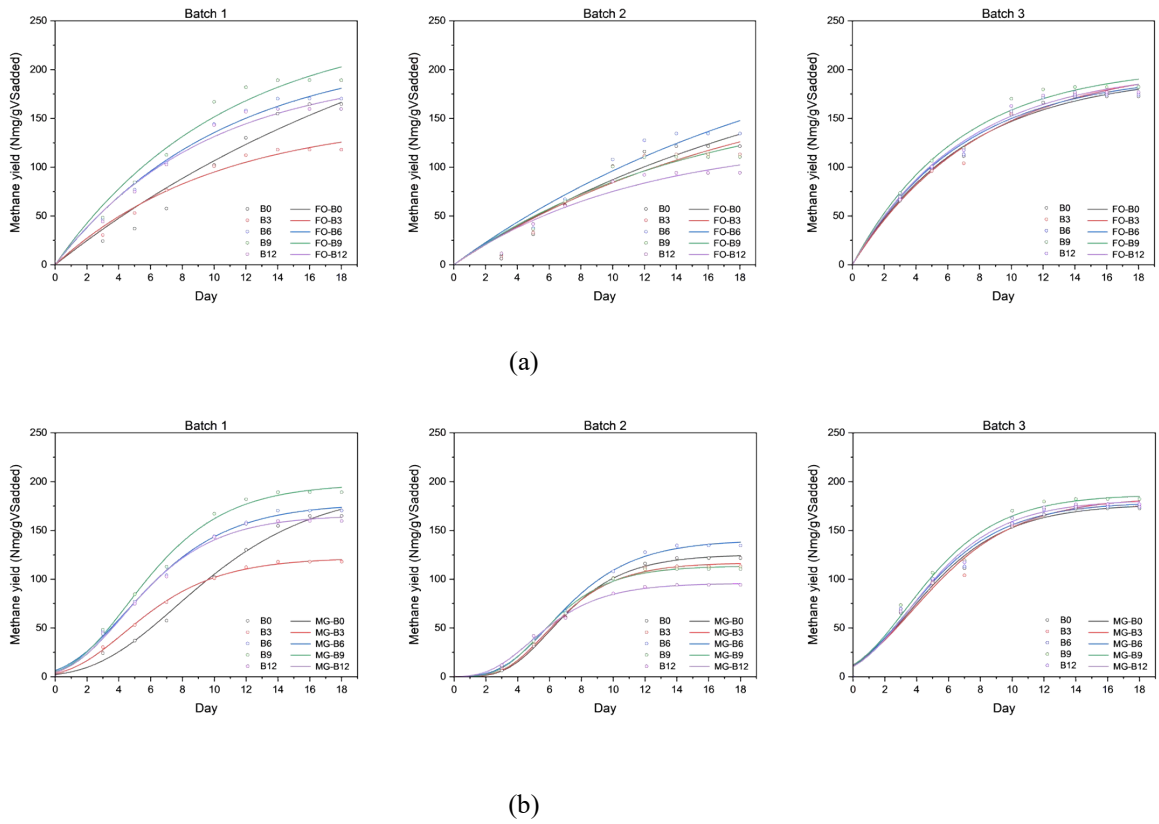

**Figure S3.** (a) First-order model and (b) Modified Gompertz model fitting to methane production from 3 batches of AD of synthetic human excreta with different biochar addition (N=3).

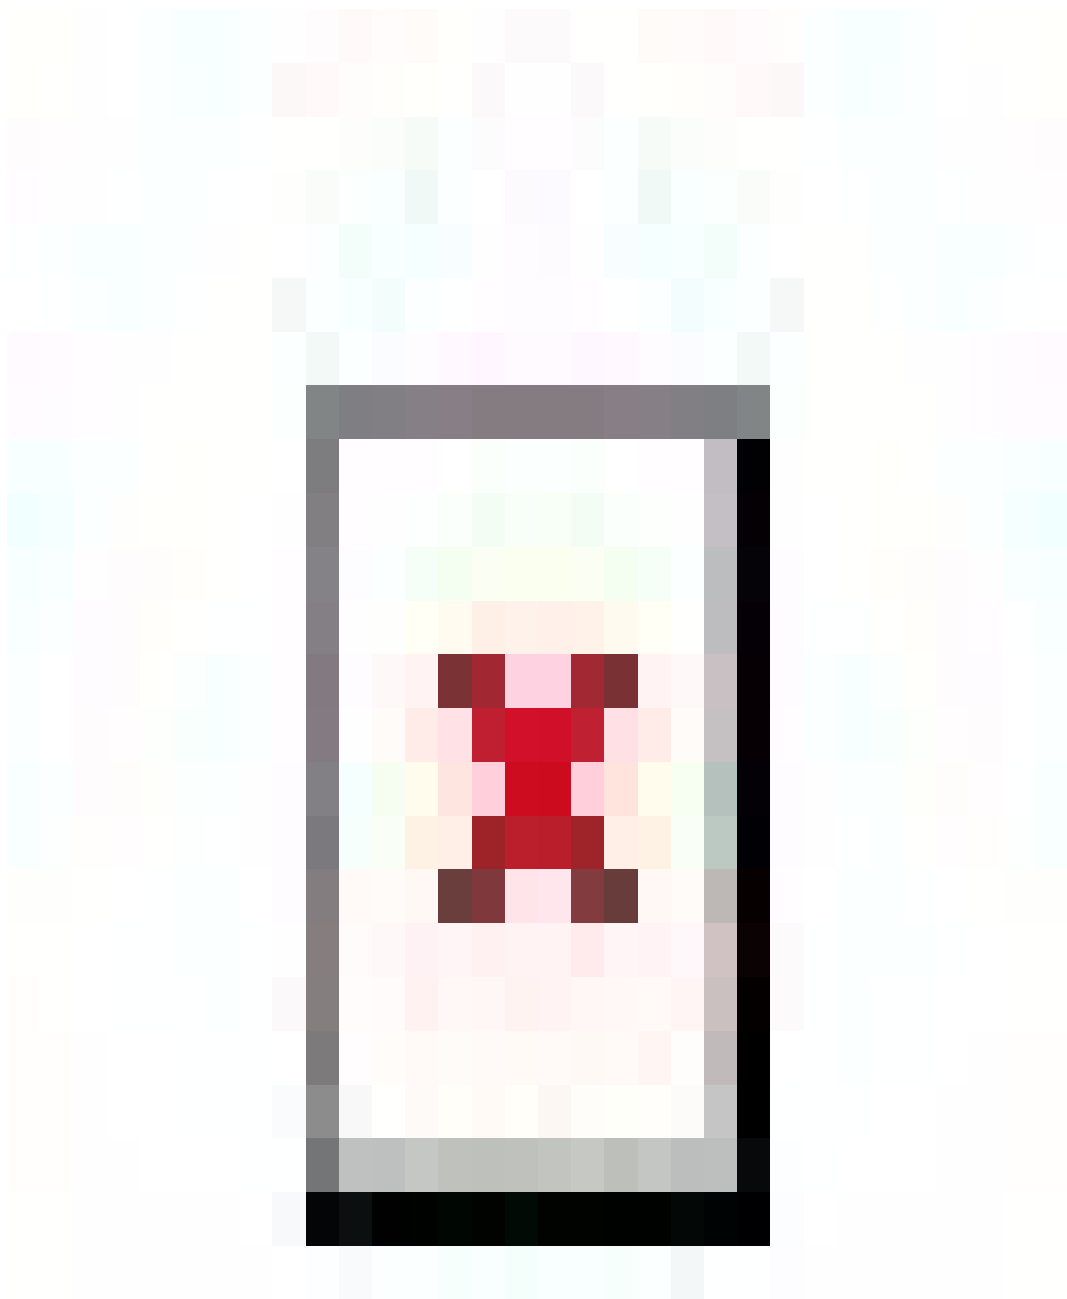

**Figure S3.** Digestate properties for each of the AD batch. Missing data was due to missing samples. \* and \*\*stands for significance level  $<0.05$  and  $0.01$ . VFA concentration is expressed as mg/l as Acetic acid.

**Table S5.** Heavy metal concentrations in Batch 1 AD feedstock mixture and digestate compared to limit for applying to agriculture and IC<sub>50</sub> for AD reactions.

| <b>Batch 1</b>                  | <b>□ mg/L</b>  | <b>Cd</b> | <b>Cr</b> | <b>Cu</b> | <b>Ni</b>     | <b>Pb</b> | <b>Zn</b>   |
|---------------------------------|----------------|-----------|-----------|-----------|---------------|-----------|-------------|
| B0                              | □              | <LOD      | <LOD      | <LOD      | 231.67±327.63 | <LOD      | 22.52±30.96 |
| B3                              | □              | <LOD      | <LOD      | <LOD      | 29.58±41.84   | <LOD      | <LOD        |
| B6                              | □              | <LOD      | <LOD      | <LOD      | 198.33±253.58 | <LOD      | <LOD        |
| B9                              | □              | <LOD      | <LOD      | <LOD      | 7.50±7.50     | <LOD      | 10.63±10.63 |
| B12                             | □              | <LOD      | <LOD      | <LOD      | <LOD          | <LOD      | <LOD        |
| Feedstock mixture               | □              | <LOD      | <LOD      | <LOD      | <LOD          | <LOD      | <LOD        |
| Limit on field <sup>5</sup>     | South Africa   | 15.7      | 1750      | 50.5      | 200           | N/A       | N/A         |
|                                 | EU             | 20        | 1000      | 1000      | 300           | N/A       | N/A         |
| IC <sub>50</sub> <sup>6,7</sup> | Acidogenesis   | 29        | 17        | 0.9       | 440           | 880       | 3.5         |
|                                 | Methanogenesis | 7.7       | 14.7      | 12.5      | 400           | 67.2      | 16          |

### 3.2 Microbial results

**Table S6.** Alpha diversity indices.

| Sample_Name   | chao1    | goods_coverage | shannon | simpson |
|---------------|----------|----------------|---------|---------|
| B12.batch 1a* | 1126.952 | 0.999          | 5.964   | 0.935   |
| B12.batch 1b  | 1122.714 | 0.999          | 5.936   | 0.931   |
| B12.batch 2c  | 923.824  | 0.999          | 5.32    | 0.911   |
| B12.batch 2a  | 904.549  | 1              | 5.214   | 0.882   |
| B12.batch 2b  | 884.159  | 1              | 5.276   | 0.897   |
| B12.batch 2c  | 894.556  | 0.999          | 4.694   | 0.821   |
| B0.batch 1a   | 1097.78  | 1              | 6.14    | 0.955   |
| B0.batch 1b   | 1067.819 | 0.999          | 6.124   | 0.956   |
| B0.batch 2c   | 1129.801 | 1              | 6.239   | 0.955   |
| B0.batch 2a   | 864.165  | 1              | 4.949   | 0.858   |
| B0.batch 2b   | 983.808  | 0.999          | 5.444   | 0.906   |
| B0.batch 2c   | 806.559  | 1              | 5.119   | 0.882   |

\*a, b, and c represent triplicated samples.

**Table S7.** Relative abundance (%) of top30 genus annotated with AD related functions.

| □                           | Taxonomy                     | B0_batch<br>1 | B12_batch<br>1 | B0_batch<br>2 | B12_batch<br>2 |
|-----------------------------|------------------------------|---------------|----------------|---------------|----------------|
| Hydrolysis-<br>Acidogenesis | Coprothermobacter            | 10.6651       | 14.5496        | 8.3028        | 7.519          |
| Hydrolysis-<br>Acidogenesis | Romboutsia                   | 9.9449        | 6.1445         | 6.5358        | 6.1117         |
| Hydrolysis-<br>Acidogenesis | Clostridium                  | 6.7972        | 3.2986         | 3.9553        | 3.9012         |
| Hydrolysis-<br>Acidogenesis | Candidatus_Caldatribacterium | 5.6503        | 7.3843         | 8.3725        | 7.6163         |
| Hydrolysis-<br>Acidogenesis | Aneurinibacillus             | 4.0192        | 3.1736         | 0.0019        | 0.0008         |
| Hydrolysis-<br>Acidogenesis | Paraclostridium              | 3.3119        | 1.183          | 5.5053        | 6.3737         |
| Hydrolysis-<br>Acidogenesis | Intestinibacter              | 1.7513        | 1.001          | 1.2289        | 1.0923         |
| Hydrolysis-<br>Acidogenesis | Terrisporobacter             | 1.4547        | 0.8461         | 1.2954        | 1.4248         |
| Hydrolysis-<br>Acidogenesis | Proteiniphilum               | 1.4261        | 1.8129         | 1.4678        | 1.6665         |
| Hydrolysis-<br>Acidogenesis | unclassified_Anaerolineaceae | 1.215         | 1.0294         | 0.9587        | 1.0365         |
| Hydrolysis-<br>Acidogenesis | Sedimentibacter              | 0.8454        | 0.9524         | 1.9163        | 1.8117         |
| Hydrolysis-<br>Acidogenesis | Tissierella                  | 0.8288        | 0.3199         | 0.4342        | 0.2928         |
| Hydrolysis-<br>Acidogenesis | unclassified_Synergistaceae  | 0.6297        | 0.5868         | 0.2454        | 0.1787         |
| Hydrolysis-<br>Acidogenesis | Turicibacter                 | 0.5643        | 0.7471         | 0.4018        | 0.4588         |
| Hydrolysis-<br>Acidogenesis | Bacillus                     | 0.2296        | 0.3237         | 0.8781        | 0.2566         |
| Acetogenesis                | Syntrophomonas               | 0.9686        | 0.9025         | 0.8808        | 0.728          |
| Acetogenesis                | Propionicimonas              | 1.2552        | 0.6442         | 0.4891        | 0.4624         |
| Acetogenesis                | Petrimonas                   | 0.8408        | 1.1228         | 0.7345        | 0.7116         |
| Acetogenesis                | Acetomicrobium               | 0.7196        | 0.7345         | 2.1958        | 1.617          |
| Methanogenesis              | Methanosarcina               | 19.2141       | 22.277         | 31.5987       | 33.9367        |

|                  |                                   |        |        |        |        |
|------------------|-----------------------------------|--------|--------|--------|--------|
| Methanogenesis   | Methanothrix                      | 1.6825 | 2.0413 | 0.0448 | 0.0444 |
| Methanogenesis   | Methanobacterium                  | 0.5975 | 0.3069 | 2.4237 | 1.855  |
| Bulk and foaming | Candidatus_Microthrix             | 0.3995 | 0.1587 | 0.9909 | 0.1934 |
| AD not related   | unclassified_D8A-2                | 0.7634 | 3.0751 | 5.5068 | 4.3716 |
| AD not related   | Advenella                         | 0.3031 | 0.3567 | 1.7235 | 0.3342 |
| AD not related   | unclassified_Doijkabacteria       | 0.6771 | 1.3341 | 0.7556 | 1.5749 |
| AD not related   | unclassified_Methylococcacea<br>e | 1.8462 | 0.044  | 0.0269 | 0.0168 |
| AD not related   | unclassified_67-14                | 1.3436 | 1.2649 | 1.7031 | 1.2487 |
| AD not related   | Amaricoccus                       | 1.2994 | 0.6411 | 1.5888 | 0.7139 |
| AD not related   | Gordonia                          | 1.9638 | 1.7694 | 0.95   | 1.5583 |
| AD not related   | Mycobacterium                     | 1.3615 | 0.5504 | 0.6762 | 0.5241 |
| AD not related   | Dechlorobacter                    | 0.0802 | 0.0227 | 0.4794 | 0.0082 |
| AD not related   | unclassified_DTU014               | 0.1738 | 0.7671 | 0.4348 | 0.5868 |
| AD not related   | IMCC26207                         | 0.56   | 0.8088 | 0.7602 | 0.6327 |
| AD not related   | unclassified_Gaiellales           | 0.7141 | 0.0871 | 0.5449 | 0.0838 |
| AD not related   | unclassified_Armatimonadota       | 0.4919 | 0.1475 | 0.201  | 0.1124 |

## References

- 1 Wignarajah K, Litwiller E, Fisher JW, Hogan J. Simulated Human Feces for Testing Human Waste Processing Technologies in Space Systems. *SAE Transactions* 2006; **115**: 424–430.
- 2 Putnam DF. Composition and concentrative properties of human urine. 1971 <https://ntrs.nasa.gov/citations/19710023044> (accessed 24 July 2023).
- 3 Colón J, Forbis-Stokes AA, Deshusses MA. Anaerobic digestion of undiluted simulant human excreta for sanitation and energy recovery in less-developed countries. *Energy for Sustainable Development* 2015; **29**: 57–64.
- 4 Penn R, Ward BJ, Strande L, Maurer M. Review of synthetic human faeces and faecal sludge for sanitation and wastewater research. *Water Research* 2018; **132**: 222–240.
- 5 Odirile PT, Obuseng VC, Moshoeshoe M, Tshenyego L, Mbongwe B. Assessment of faecal sludge quality, heavy metal contamination, and ecological risk: implications for sustainable agriculture. *Environ Monit Assess* 2024; **196**: 1270.
- 6 Lin C-Y. Effect of heavy metals on volatile fatty acid degradation in anaerobic digestion. *Water Research* 1992; **26**: 177–183.
- 7 Kadam R, Khanthong K, Jang H, Lee J, Park J, Kadam R *et al*. Occurrence, Fate, and Implications of Heavy Metals during Anaerobic Digestion: A Review. *Energies* 2022; **15**. doi:10.3390/en15228618.
